# Supplementary material for: New experimental setup for the measurement of cleaning efficacy and force of interdental aids in 3D-reproduced interdental areas
Source: Springer Nature journal article supplement (doi:10.1186/s12903-020-01129-z), 2020-05-08
Supplement: MOESM1 [file 17965462]

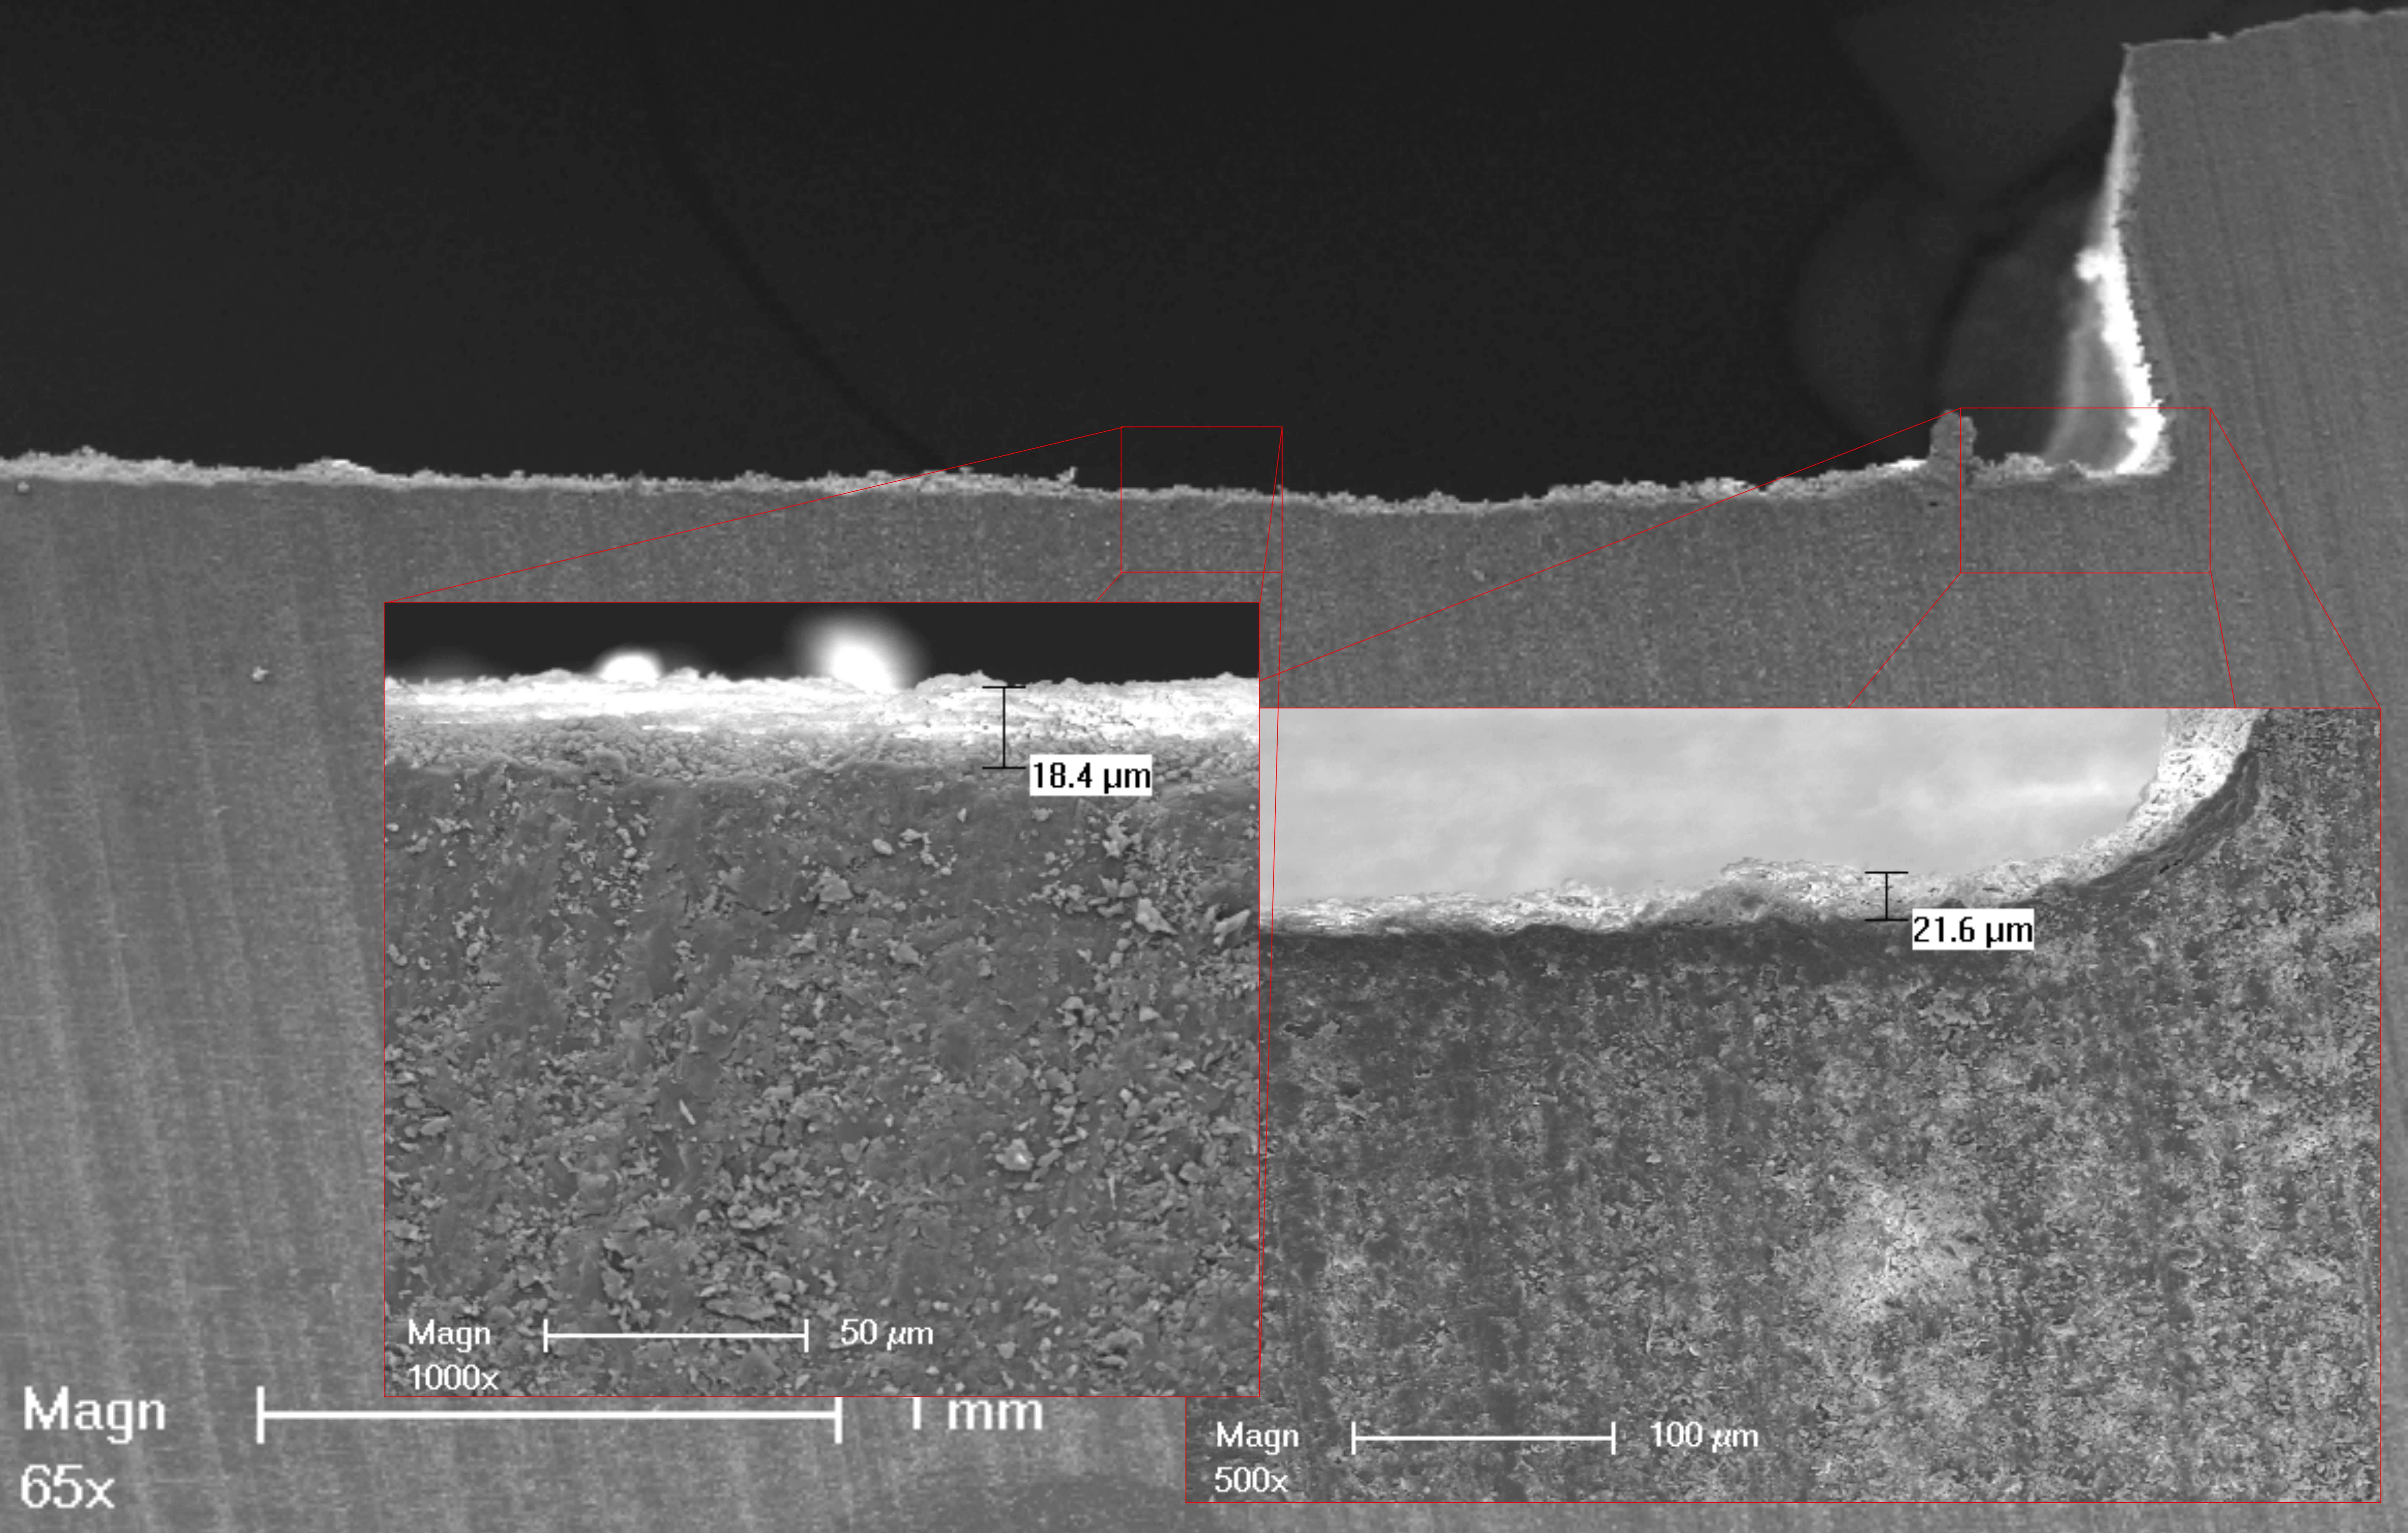

18.4 μm

21.6 μm

Magn  
1000x

50 μm

Magn  
500x

100 μm

Magn  
65x

1 mm
